# Supplementary material
Source: PubMed Central journal article supplement (PMC6859694)
Supplement: Supp_Fig1.pdf [file Supp_Fig1.pdf]

## Supplementary Data

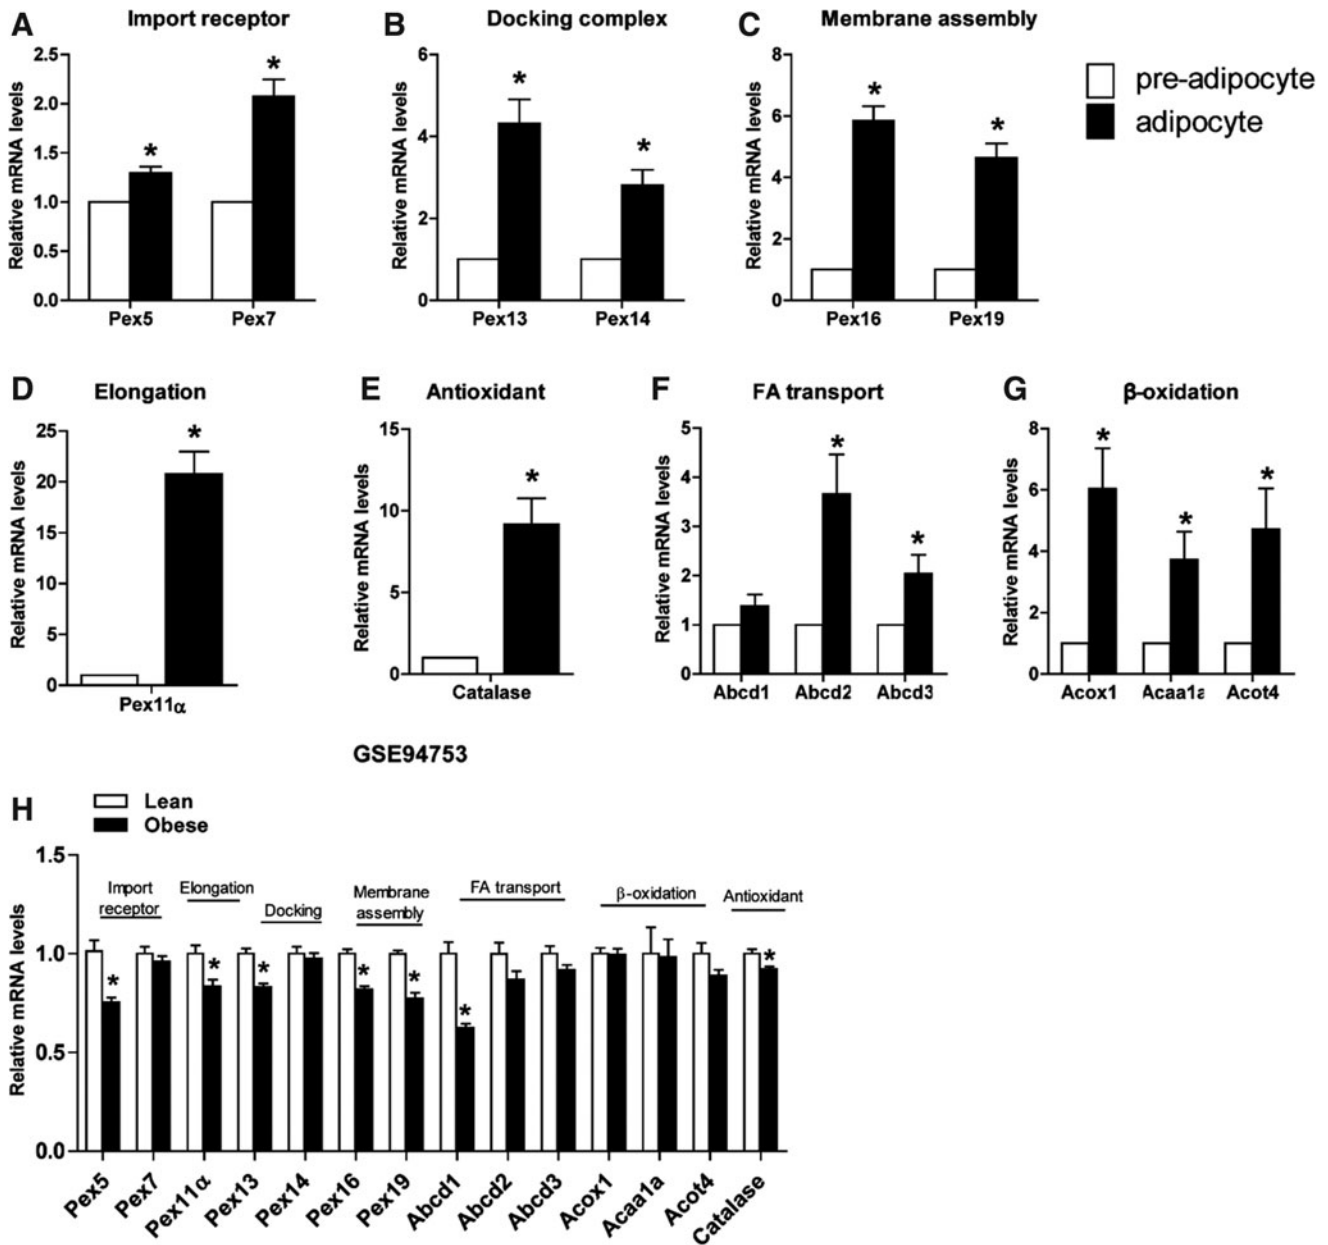

**SUPPLEMENTARY FIG. S1. Expression of genes related to peroxisomal biogenesis and function in differentiated 3T3-L1 adipocyte and human WAT.** (A–G) mRNA levels of genes related to peroxisomal biogenesis and function in 3T3-L1 adipocytes were measured by quantitative polymerase chain reaction. Values represent mean  $\pm$  SE of 3–4 experiments. \* $p < 0.05$  versus preadipocytes. (H) Analysis of peroxisome-related gene expressions from Gene Expression Omnibus database (GSE94753). Abdominal subcutaneous WAT samples were collected from women who were either lean (BMI  $< 25$  kg/m $^2$ ,  $n = 9$ ) or obese (BMI  $\geq 30$  kg/m $^2$ ,  $n = 18$ ). Values represent means  $\pm$  SE, \* $p < 0.05$  versus lean subjects. BMI, body mass index; SE, standard error; WAT, white adipose tissue.
