# Supplementary material
Source: PubMed Central journal article supplement (PMC6859694)
Supplement: Supp_Fig2.pdf [file Supp_Fig2.pdf]

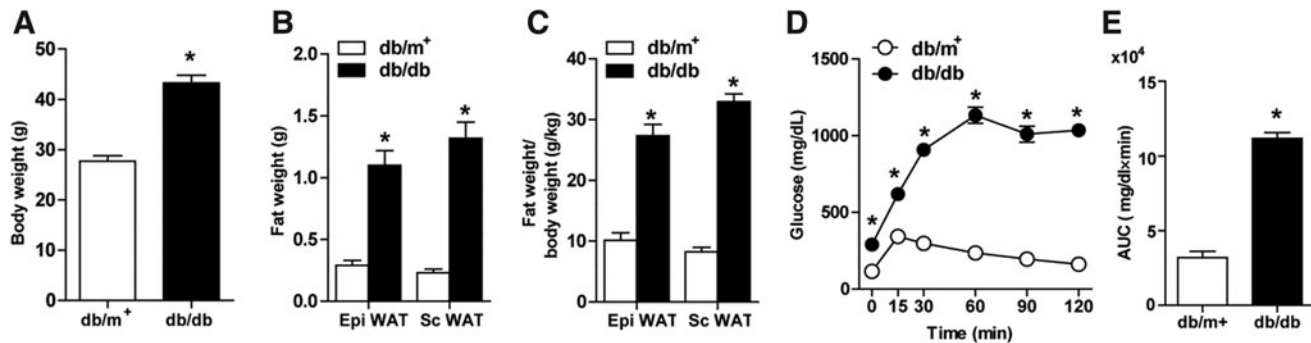

**SUPPLEMENTARY FIG. S2. Characteristics of 20-week-old db/db and db/m<sup>+</sup> mice.** (A) Body weight, epididymal and subcutaneous WAT weight (B) before and (C) after corrected by body weight are shown. (D) IPGTT was performed by injecting 1 g glucose per kilogram body weight after 16 h fasting. (E) AUC of IPGTT was calculated. (A–E) Values represent means  $\pm$  SE of five mice. \* $p < 0.05$  versus db/m<sup>+</sup>. AUC, area under the curve; IPGTT, intraperitoneal glucose tolerance test.
