# Supplementary material
Source: PubMed Central journal article supplement (PMC6859694)
Supplement: Supp_Fig3.pdf [file Supp_Fig3.pdf]

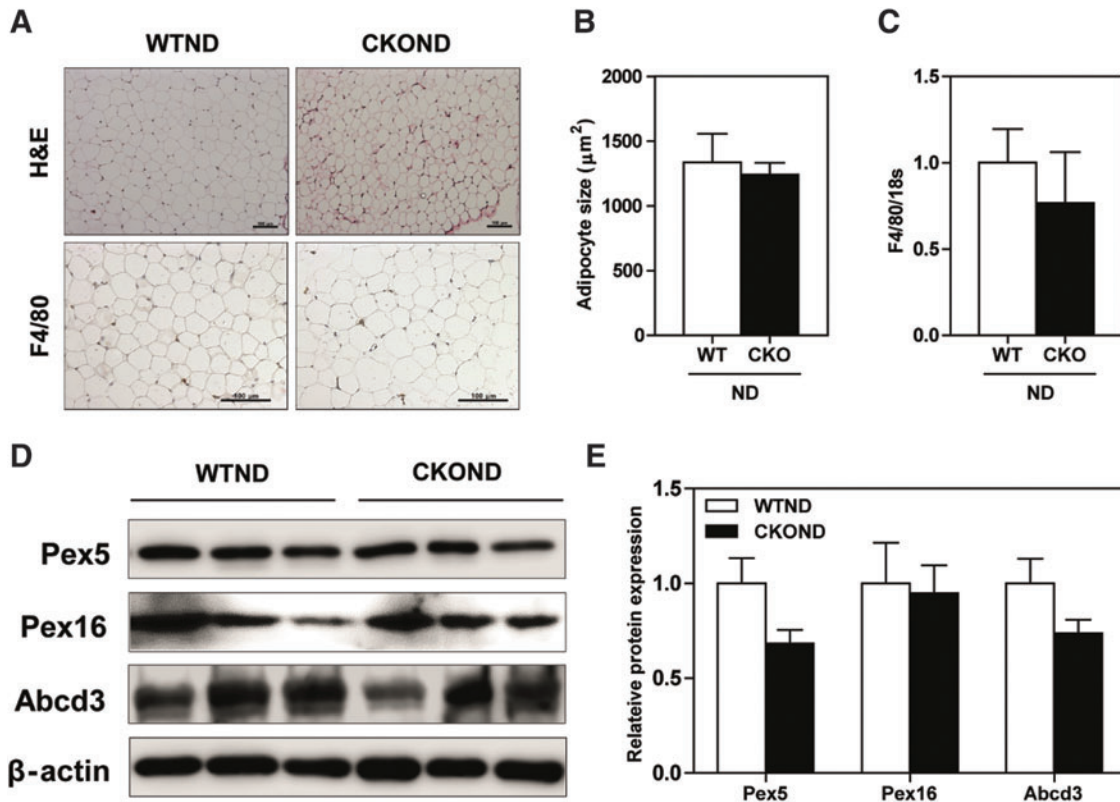

**SUPPLEMENTARY FIG. S3. Adipocytes injury and decreased peroxisomal proteins are not observed in ND-fed CKO mice.** (A) H&E and F4/80 staining of WAT are shown. Original magnification:  $100\times$  (H&E) and  $200\times$  (F4/80); scale bar:  $100\ \mu\text{m}$ . (B) Measurement of adipocyte size in WAT. (C) Relative mRNA level of F4/80. (D, E) Western blot analyses of Pex5, Pex16, and Abcd3 are shown. Expression levels of indicated proteins were quantified by densitometry and normalized with  $\beta$ -actin. Values represent means  $\pm$  SE of six mice. CKO, catalase knock out; H&E, hematoxylin and eosin; ND, normal diet; Pex, peroxisomal biogenesis factor.
