# Supplementary material
Source: PubMed Central journal article supplement (PMC6859694)
Supplement: Supp_Fig4.pdf [file Supp_Fig4.pdf]

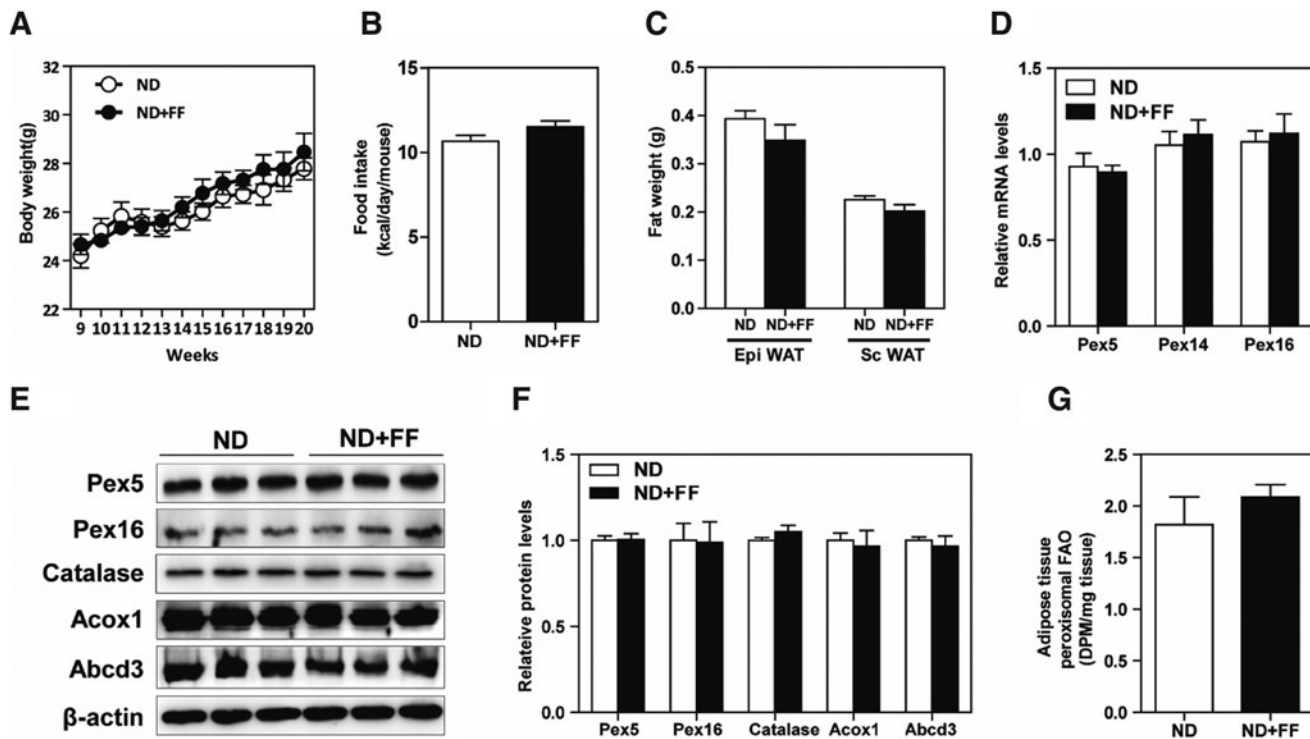

**SUPPLEMENTARY FIG. S4. Fenofibrate treatment does not increase peroxisomal biogenesis and FAO in ND-fed WT mice.** (A) Body weight and (B) food intake are shown. (C) Epididymal and subcutaneous WAT weights were measured. (D) Relative mRNA levels of Pex5, Pex14, and Pex16 in WAT were measured. (E, F) Western blot analyses of Pex5, Pex16, catalase, Acox1, and Abcd3 are shown. Expression levels of indicated proteins were quantified by densitometry and normalized with  $\beta$ -actin. (G) Peroxisomal FAO in WAT was measured. Values represent means  $\pm$  SE of six mice. FAO, fatty acid oxidation; WT, wild type.
