# Supplementary material
Source: PubMed Central journal article supplement (PMC6859694)
Supplement: Supp_Fig5.pdf [file Supp_Fig5.pdf]

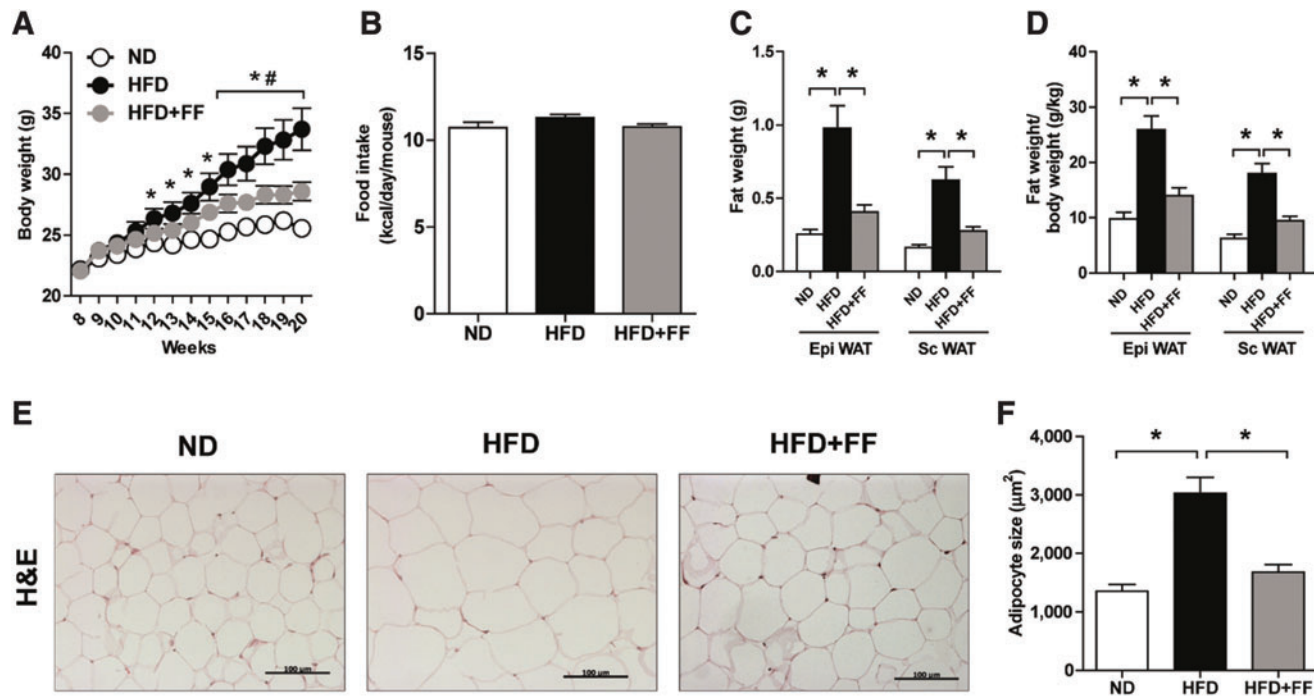

**SUPPLEMENTARY FIG. S5. Fenofibrate reduces body weight, fat weight, and adipocyte size in HFD-induced obesity.** (A) Body weight was measured every week and (B) food intake was checked every 3 days. (C, D) Epididymal and subcutaneous WAT weights before and after corrected by body weight are shown. (E) H&E staining and (F) measurement of adipocyte size in WAT. Original magnification: 200×; scale bar: 100 µm. (A–F) Values represent means ± SE of seven mice. \* $p < 0.05$ . # $p < 0.05$  vs. HFD. HFD, high-fat diet.
