# Supplementary material
Source: PubMed Central journal article supplement (PMC6859694)
Supplement: Supp_Fig7.pdf [file Supp_Fig7.pdf]

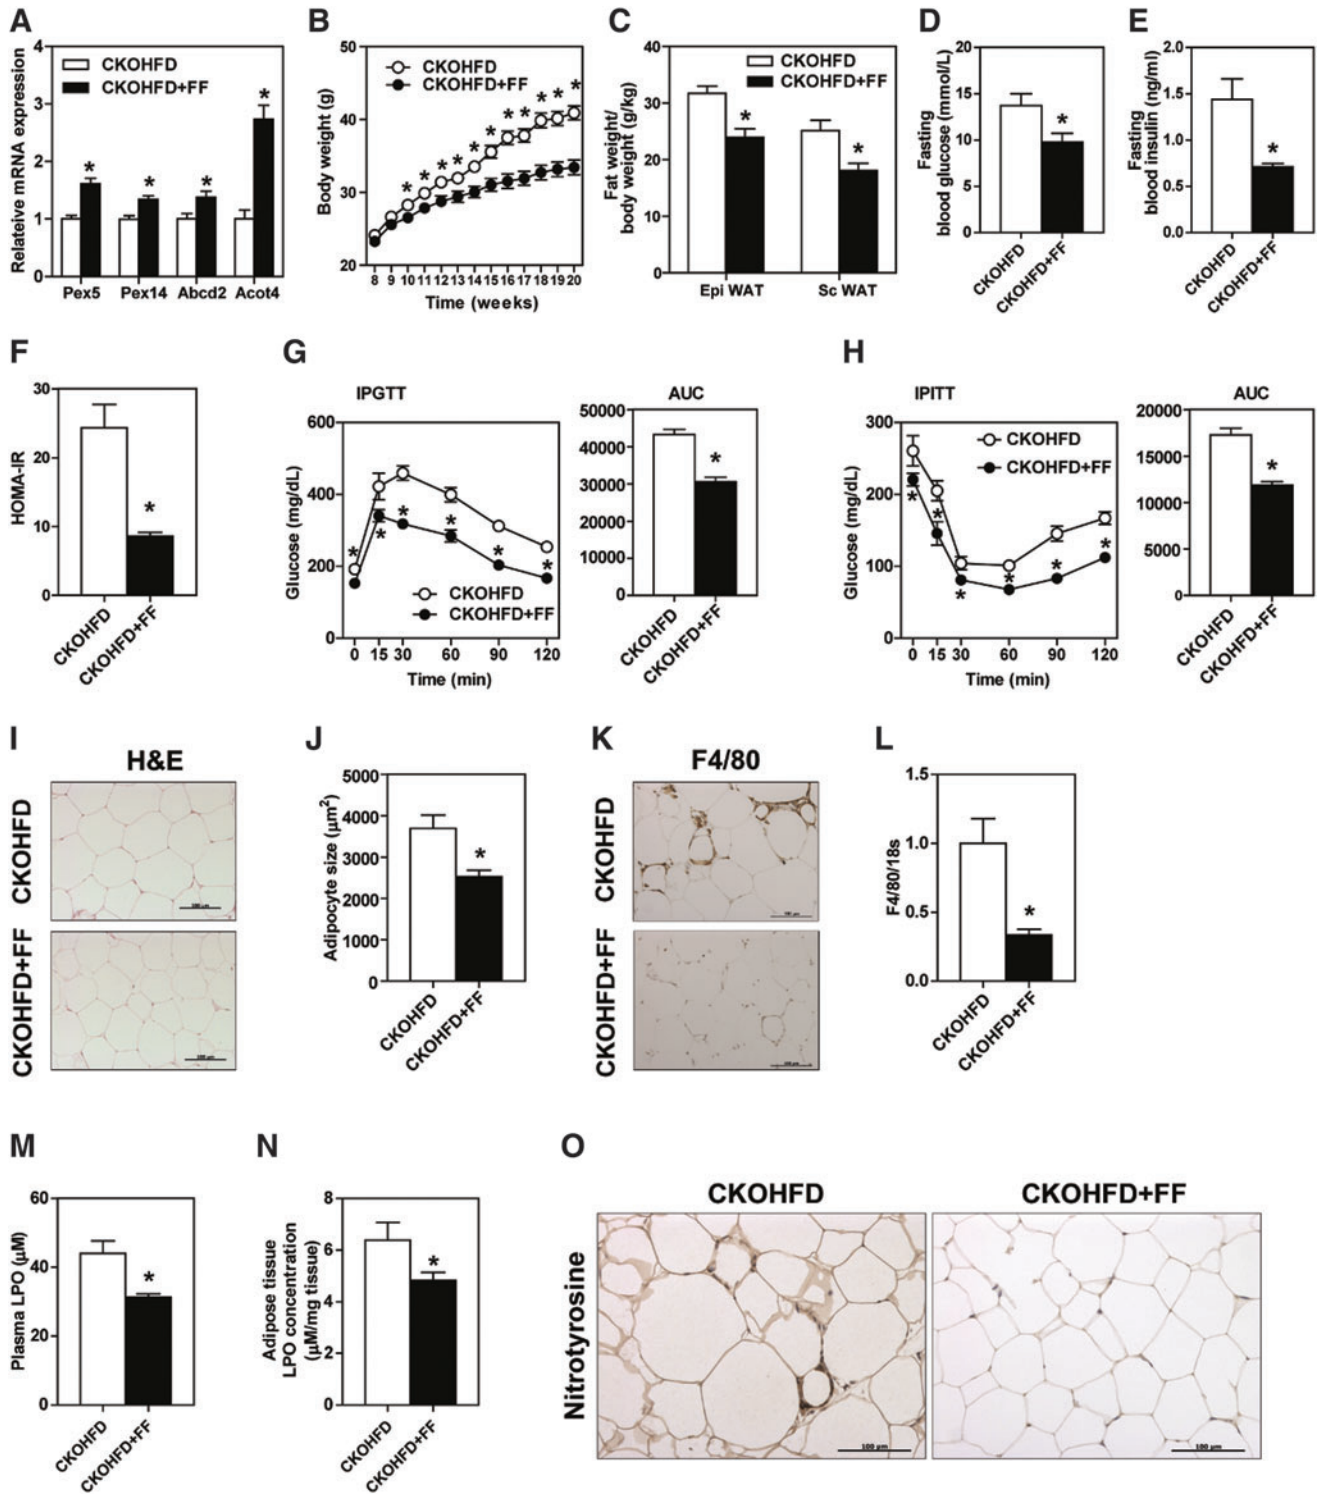

**SUPPLEMENTARY FIG. S7. Fenofibrate treatment increases peroxisomal biogenesis and attenuates HFD-induced adipocyte injury in CKO mice.** (A) Relative mRNA levels of Pex5, Pex14, Abcd2, and Acot4 in WAT of HFD-fed CKO mice with or without 12-week-fenofibrate treatment. (B) Body weight was measured every week. (C) Epididymal and subcutaneous WAT weights corrected by body weight are shown. (D) Plasma glucose and (E) insulin levels were measured in fasting state. (F) HOMA-IR was calculated by using this formula:  $(\text{FPI} \times \text{FPG}) / 22.5$ . (G) IPGTT of 18-week-CKO mice was performed by injecting 1 g glucose per kilogram body weight after 16 h fasting; AUC of IPGTT was calculated. (H) IPITT was performed by injecting 0.75 IU insulin per kilogram body weight after 5 h fasting; AUC of IPITT was calculated. (I) H&E staining and (J) measurement of adipocyte size in WAT. (K) F4/80 immunostaining and (L) mRNA level in WAT are shown. (M) Plasma and (N) WAT LPO levels were measured. (O) Nitrotyrosine immunostaining of WAT is shown. Original magnification: 200 $\times$ ; scale bar: 100  $\mu\text{m}$ . Values represent means  $\pm$  SE of 7–9 mice. \* $p < 0.05$  versus CKO HFD. LPO, lipid peroxides.
