# Supplementary material
Source: PubMed Central journal article supplement (PMC6859694)
Supplement: Supp_Fig8.pdf [file Supp_Fig8.pdf]

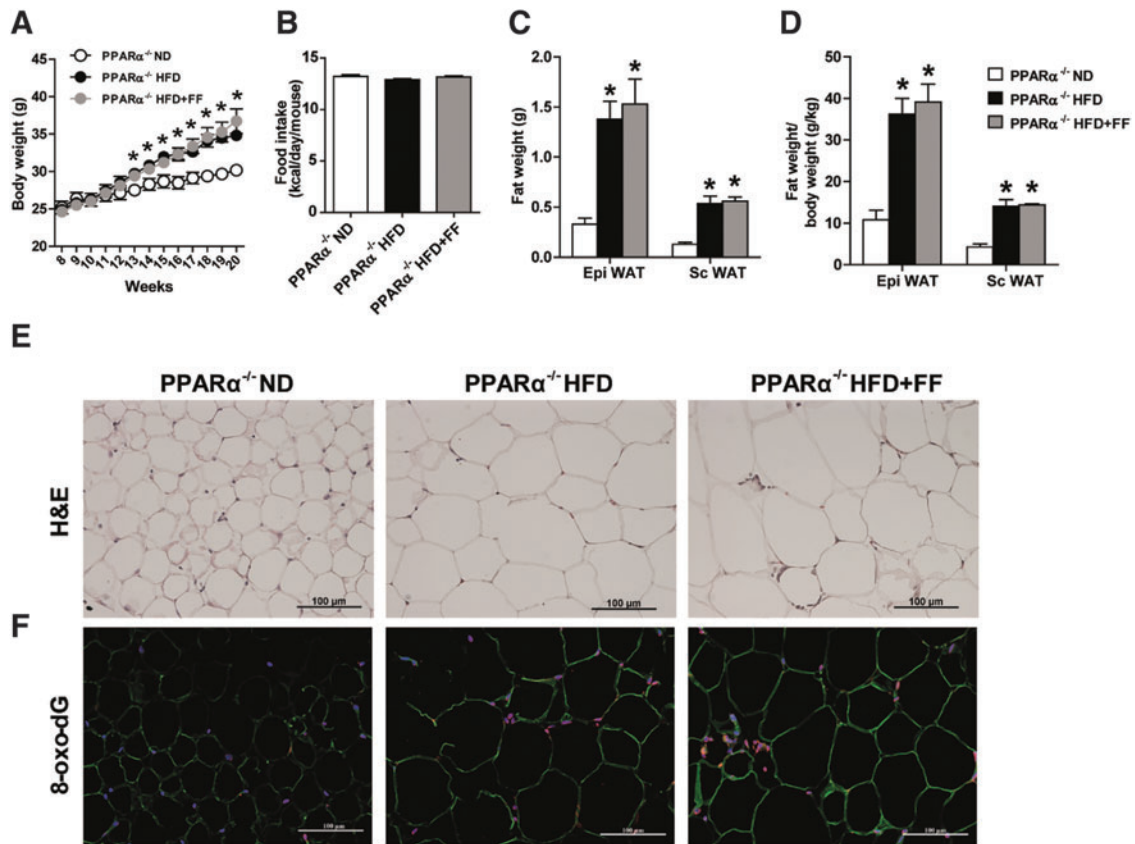

**SUPPLEMENTARY FIG. S8. Fenofibrate-induced adiposity reduction in HFD-fed mice depends on PPAR $\alpha$ .** (A) Body weight was measured every week and (B) food intake was checked every 3 days in PPAR $\alpha$  null mice. (C, D) Epididymal and subcutaneous WAT weights before and after corrected by body weight are shown. (E) H&E staining of WAT. (F) 8-oxo-dG, perlipin, and DAPI coimmunostaining analysis of WAT. Original magnification: 200 $\times$ ; scale bar: 100  $\mu$ m. (A–F) Values represent mean  $\pm$  SE of 4–6 mice. \* $p$  < 0.05 versus PPAR $\alpha^{-/-}$  ND. DAPI, 4',6-diamidino-2-phenylindole; PPAR $\alpha$ , peroxisomal proliferator-activated receptor alpha.
