# Supplementary material
Source: PubMed Central journal article supplement (PMC6859694)
Supplement: Supp_Fig9.pdf [file Supp_Fig9.pdf]

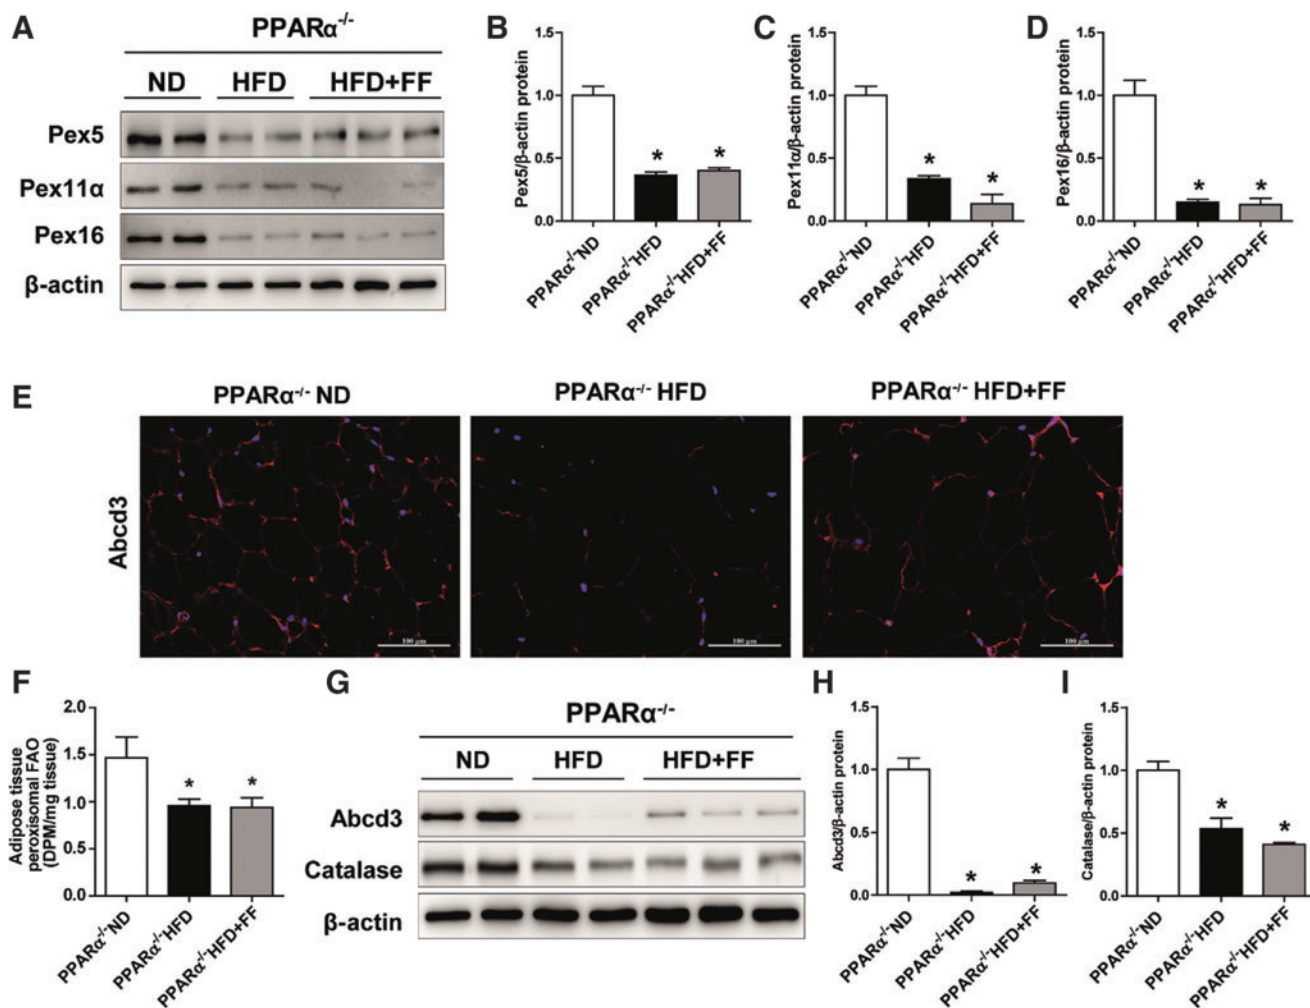

**SUPPLEMENTARY FIG. S9. Fenofibrate-induced peroxisomal biogenesis and function in HFD-fed mice depend on PPAR $\alpha$ .** (A–D) Western blot analyses of Pex5, Pex11 $\alpha$ , and Pex16 are shown. (E) Immunostaining of Abcd3 (red) and DAPI nuclear counterstains (blue) in WAT. Original magnification: 200 $\times$ ; scale bar: 100  $\mu$ m. (F) Peroxisomal FAO in WAT was measured. (G–I) Western blot analyses of Abcd3 and catalase are shown. Expression levels of indicated proteins were quantified by densitometry and normalized with  $\beta$ -actin. (A–I) Values represent means  $\pm$  SE of 4–6 mice. \* $p$  < 0.05 versus ND.
