# Supplementary material
Source: PubMed Central journal article supplement (PMC6859694)
Supplement: Supp_Fig10.pdf [file Supp_Fig10.pdf]

**Figure 2B**

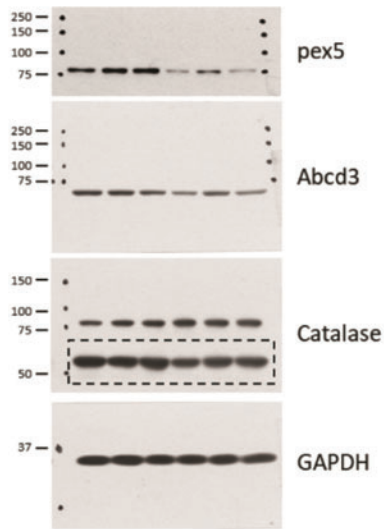

**Figure 3D**

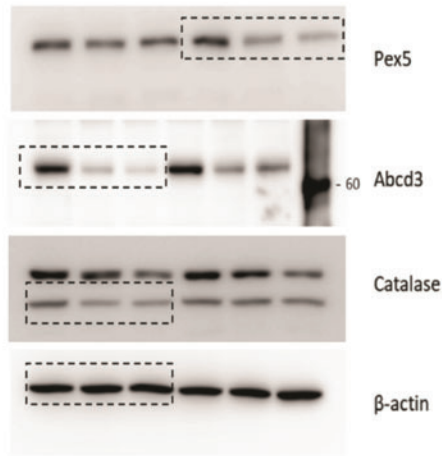

**Figure 4O**

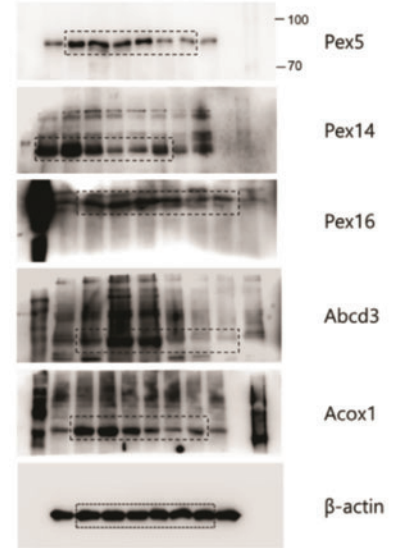

**Figure 5A**

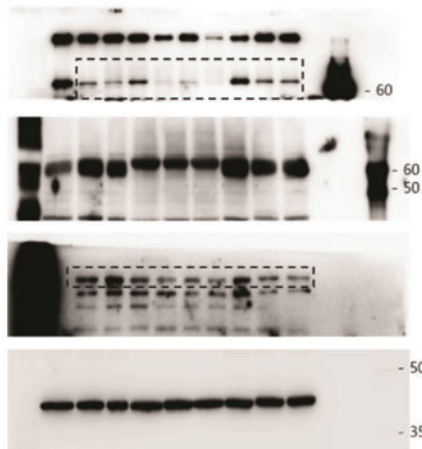

**Figure 5H**

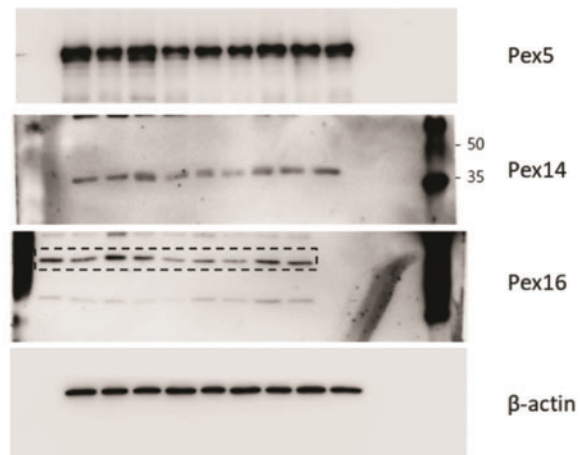

**SUPPLEMENTARY FIG. S10. Uncropped immunoblots. Boxes indicate areas used for cropped panels.**
