# Supplementary material
Source: PubMed Central journal article supplement (PMC6859694)
Supplement: Supp_Table1.pdf [file Supp_Table1.pdf]

SUPPLEMENTARY TABLE S1. PRIMER SEQUENCES FOR QUANTITATIVE POLYMERASE CHAIN REACTION ANALYSIS

| <i>Gene</i>    | <i>Forward primer (5'-3')</i> | <i>Reverse primer (5'-3')</i> |
|----------------|-------------------------------|-------------------------------|
| 18s            | CGA AAG CAT TTG CCA AGA AT    | AGT CGG CAT CGT TTA TGG TC    |
| Abcd1          | AGT GCC ATC CGC TAC CTA GA    | CAG GGT TTC GAA GTC GTC CA    |
| Abcd2          | AAA TTT GGT TCG CTG GTG GC    | CCA CAG CTG CTC CAC ACA TA    |
| Abcd3          | GGG ACA GTG TTC AGG ACT GGA T | CAG TCT TGC CAT CGC CAT T     |
| Acaa1a         | AGA CAT CTC CGT GGG CAA TG    | GTA CAG TAT CTG GGA TGC CG    |
| Acot4          | TGC TGT AGG AGG CTG TGA GA    | GGG GCC TTT CCT TTC CAT GA    |
| Acox1          | AGA TTG GTA GAA ATT GCT GC    | ACG CCA CTT CCT TGC TCT TC    |
| Adiponectin    | AGG AGC TGA AGG GCC ACG GG    | TGG GAA CAG TGA CGC GGG TC    |
| Catalase       | CAC ACC TAC ACG CAG GCC GG    | CTG CGC TCC GGA GTG GGA GA    |
| Cd11c          | TGG CTT CAA CTT GGA TGC AGA   | CAA CCA CCA CCC AGG AAC TA    |
| F4/80          | CTG TAA CCG GAT GGC AAA CT    | ATG GCC AAG GCA AGA CAT AC    |
| IL-6           | AGT TGC CTT CTT GGG ACT GA    | TCC ACG ATT TCC CAG AGA AC    |
| MCP-1          | CTT CTG GGC CTG CTG TTC A     | CCA GCC TAC TCA TTG GGA TCA   |
| NLRP3          | ATT ACC CGC CCG AGA AAG G     | CAT GAG GTG GCT AGA TCC AAG   |
| Pex5           | AAA TTC GTG CGG CAG ATT GG    | TGC TGC CCA CTG TTC TGC CT    |
| Pex7           | GGA GCC AAA CCA GAG GTG AA    | TGA CAC TCT CAT GGC CCC TA    |
| Pex11 $\alpha$ | CAC TGG CCG TAA ATG GTT CA    | GCT TGG ATG CTC TGC TCA GTT   |
| Pex13          | CCA TGT AGT TGC CAG AGC AG    | CAT CAA GGC TAG CCA GAA GC    |
| Pex14          | CTC CAC GAC TGG GCG GAA GC    | GCA GGG GCG TTG AGT GCA GA    |
| Pex16          | GCA GGA GAC CAT TGC AGA GT    | CAC ACC AGA CAG TAG CCA GC    |
| Pex19          | TGT GCT GTA CCC ATC CCT GA    | TGC TGC TGC TGG TAC TTC TC    |

Acaa1a, acetyl-CoA acyltransferase 1A; NLRP3, NLR family pyrin domain containing 3.
